# Supplementary material
Source: publisher figshare collection journal article supplement (https://sage.figshare.com/ndownloader/files/16250699)
Supplement: Supplementary file 1 [file 16250699]

## **Supplementary Material**

Title: Information on the survey content

Description: Information on the survey content included in the 'Clinical capacity of Australian and New Zealand psychiatrists who work with people with IDD'.

Supplementary material content:

The six key areas covered in the survey include:

- i) demographics;
- ii) roles and responsibilities in the area of IDDMH;
- iii) pathways to gaining an interest/work in the area of IDDMH;
- iv) support for, and interest in undertaking advanced training in IDDMH;
- v) capacity and interest in training future psychiatrists in the area of IDDMH; and
- vi) barriers and facilitators to training future psychiatrists in the area of IDDMH.
